# Supplementary material for: Melt-grown large-sized Cs2TeI6 crystals for X-ray detection
Source: Royal Society of Chemistry journal article supplement (doi:10.1039/d0ce00868k), 2020-01-01
Supplement: d0ce00868k1.pdf [file d0ce00868k1.pdf]

## Supporting Information

### **Melt-Grown Large-Sized Cs<sub>2</sub>TeI<sub>6</sub> Crystals for X-Ray Detection**

Bao Xiao,<sup>a</sup> Fangbao Wang,<sup>a</sup> Meng Xu,<sup>a</sup> Xin Liu,<sup>a</sup> Qihao Sun,<sup>a</sup> Bin-Bin Zhang,<sup>\*a</sup> Wanqi Jie,<sup>a</sup>

Paul Sellin,<sup>b</sup> and Yadong Xu<sup>\*a</sup>

*<sup>a</sup> State Key Laboratory of Solidification Processing, Key Laboratory of Radiation Detection Materials and Devices, Ministry of Industry and Information Technology, and School of Materials Science and Engineering, Northwestern Polytechnical University, Xi'an, Shaanxi 710072, China.*

*<sup>b</sup> Department of Physics, University of Surrey, Guildford, Surrey, UK.*

### **Corresponding Author:**

\*E-mail address: [zbb@nwpu.edu.cn](mailto:zbb@nwpu.edu.cn) (B.-B. Zhang), [xyd220@nwpu.edu.cn](mailto:xyd220@nwpu.edu.cn) (Y. D. Xu).

## 1. The calibration of X-ray dose rate.

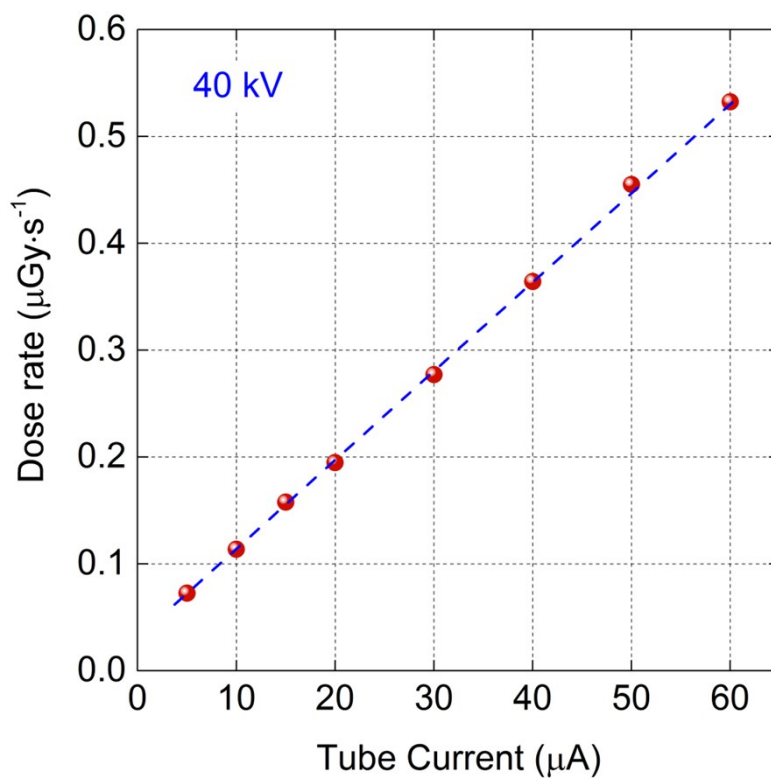

Fig. S1 The relationship between the dose rate and current of X-ray tube.

## 2. The characterization of photoresponse of $\text{Cs}_2\text{TeI}_6$ crystal.

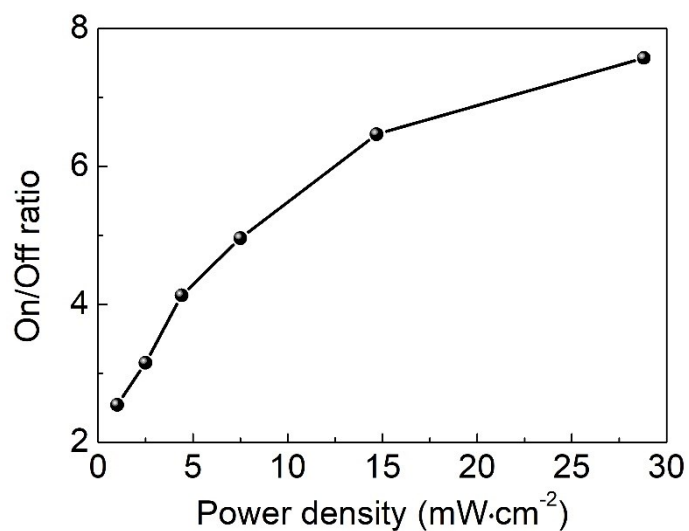

Fig. S2 Power-dependent ratio of on-off current illuminated by blue light with a wavelength of 425 nm under 100 V.

### 3. The calculation of signal-to-noise ratio.

As shown in Fig. S3, the signal current ( $I_{signal}$ ) was derived by subtracting the average photocurrent ( $\bar{I}_{photo}$ ) by the average dark current ( $\bar{I}_{dark}$ ). The noise current ( $I_{noise}$ ) was obtained by calculating the standard deviation of the photocurrent.

$$I_{signal} = \bar{I}_{photo} - \bar{I}_{dark}$$
$$I_{noise} = \sqrt{\frac{1}{N} \sum_i^N (I_i - \bar{I}_{photo})^2}$$

Then the signal-to-noise ratio (SNR) was calculated using

$$SNR = I_{signal} / I_{noise}$$

For example, for  $Cs_2TeI_6$  device with 5 V bias and under  $277.1 \text{ nGy}\cdot\text{s}^{-1}$ , the calculated average photocurrent, dark current, and noise current was 2.243 pA, 1.903 pA, and 0.014 pA, respectively, resulting in a SNR value of 24.3.

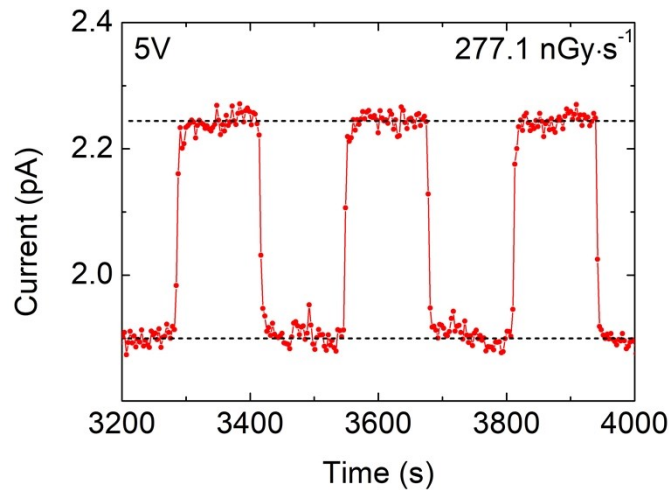

Fig. S3. Device response to X-rays ( $277.1 \text{ nGy}\cdot\text{s}^{-1}$  dose rate) on tuning the X-ray source on and off.
